# Supplementary material for: Two New Cyathane Diterpenoids from Mycelial Cultures of the Medicinal Mushroom Hericium erinaceus and the Rare Species, Hericium flagellum
Source: PubMed Central journal article supplement (PMC5877601; doi:10.3390/ijms19030740), 2018-03-06

## Supplementary Information

# Two New Cyathane Diterpenoids from Mycelial Cultures of the Medicinal Mushroom *Hericium erinaceus* and the Rare Species, *Hericium flagellum*

Zeljka Rupcic<sup>1,2†</sup>, Monique Rascher<sup>1,2,3†</sup>, Sae Kanaki<sup>1,4</sup>, Reinhard W. Köster<sup>3</sup>, Marc Stadler<sup>1,2,\*</sup> and Kathrin Wittstein<sup>1,2,\*</sup>

<sup>1</sup> Department Microbial Drugs, Helmholtz Centre for Infection Research GmbH, Inhoffenstraße 7, 38124 Braunschweig, Germany; [zeljka.rupcic@helmholtz-hzi.com](mailto:zeljka.rupcic@helmholtz-hzi.com), [monique.rascher@helmholtz-hzi.de](mailto:monique.rascher@helmholtz-hzi.de), [kathrin.wittstein@helmholtz-hzi.de](mailto:kathrin.wittstein@helmholtz-hzi.de), [marc.stadler@helmholtz-hzi.de](mailto:marc.stadler@helmholtz-hzi.de)

<sup>2</sup> German Centre for Infection Research (DZIF), partner site Hannover-Braunschweig, 38124 Braunschweig, Germany; [zeljka.rupcic@helmholtz-hzi.com](mailto:zeljka.rupcic@helmholtz-hzi.com), [monique.rascher@helmholtz-hzi.de](mailto:monique.rascher@helmholtz-hzi.de), [kathrin.wittstein@helmholtz-hzi.de](mailto:kathrin.wittstein@helmholtz-hzi.de), [marc.stadler@helmholtz-hzi.de](mailto:marc.stadler@helmholtz-hzi.de)

<sup>3</sup> Zoological Institute, Technical University of Braunschweig, Spielmannstraße 7, 38106 Braunschweig, Germany; [r.koester@tu-braunschweig.de](mailto:r.koester@tu-braunschweig.de)

<sup>4</sup> Toyama Prefectural University, 5180 Kurokawam Imizu-shi, Toyama 939-0398, Japan; [t416010@st.pu-toyama.ac.jp](mailto:t416010@st.pu-toyama.ac.jp)

\* Correspondence: [kathrin.wittstein@helmholtz-hzi.de](mailto:kathrin.wittstein@helmholtz-hzi.de), Tel.: +49 0531 6181-1930 and [marc.stadler@helmholtz-hzi.de](mailto:marc.stadler@helmholtz-hzi.de), Tel.: +49 0531 6181-4240

### Content:

NMR spectra of Erinacines Z1 and Z2 (Figures S1-13)

Figure S1: <sup>1</sup>H-NMR spectrum (500 MHz, CDCl<sub>3</sub>) of Erinacine Z1 (1)

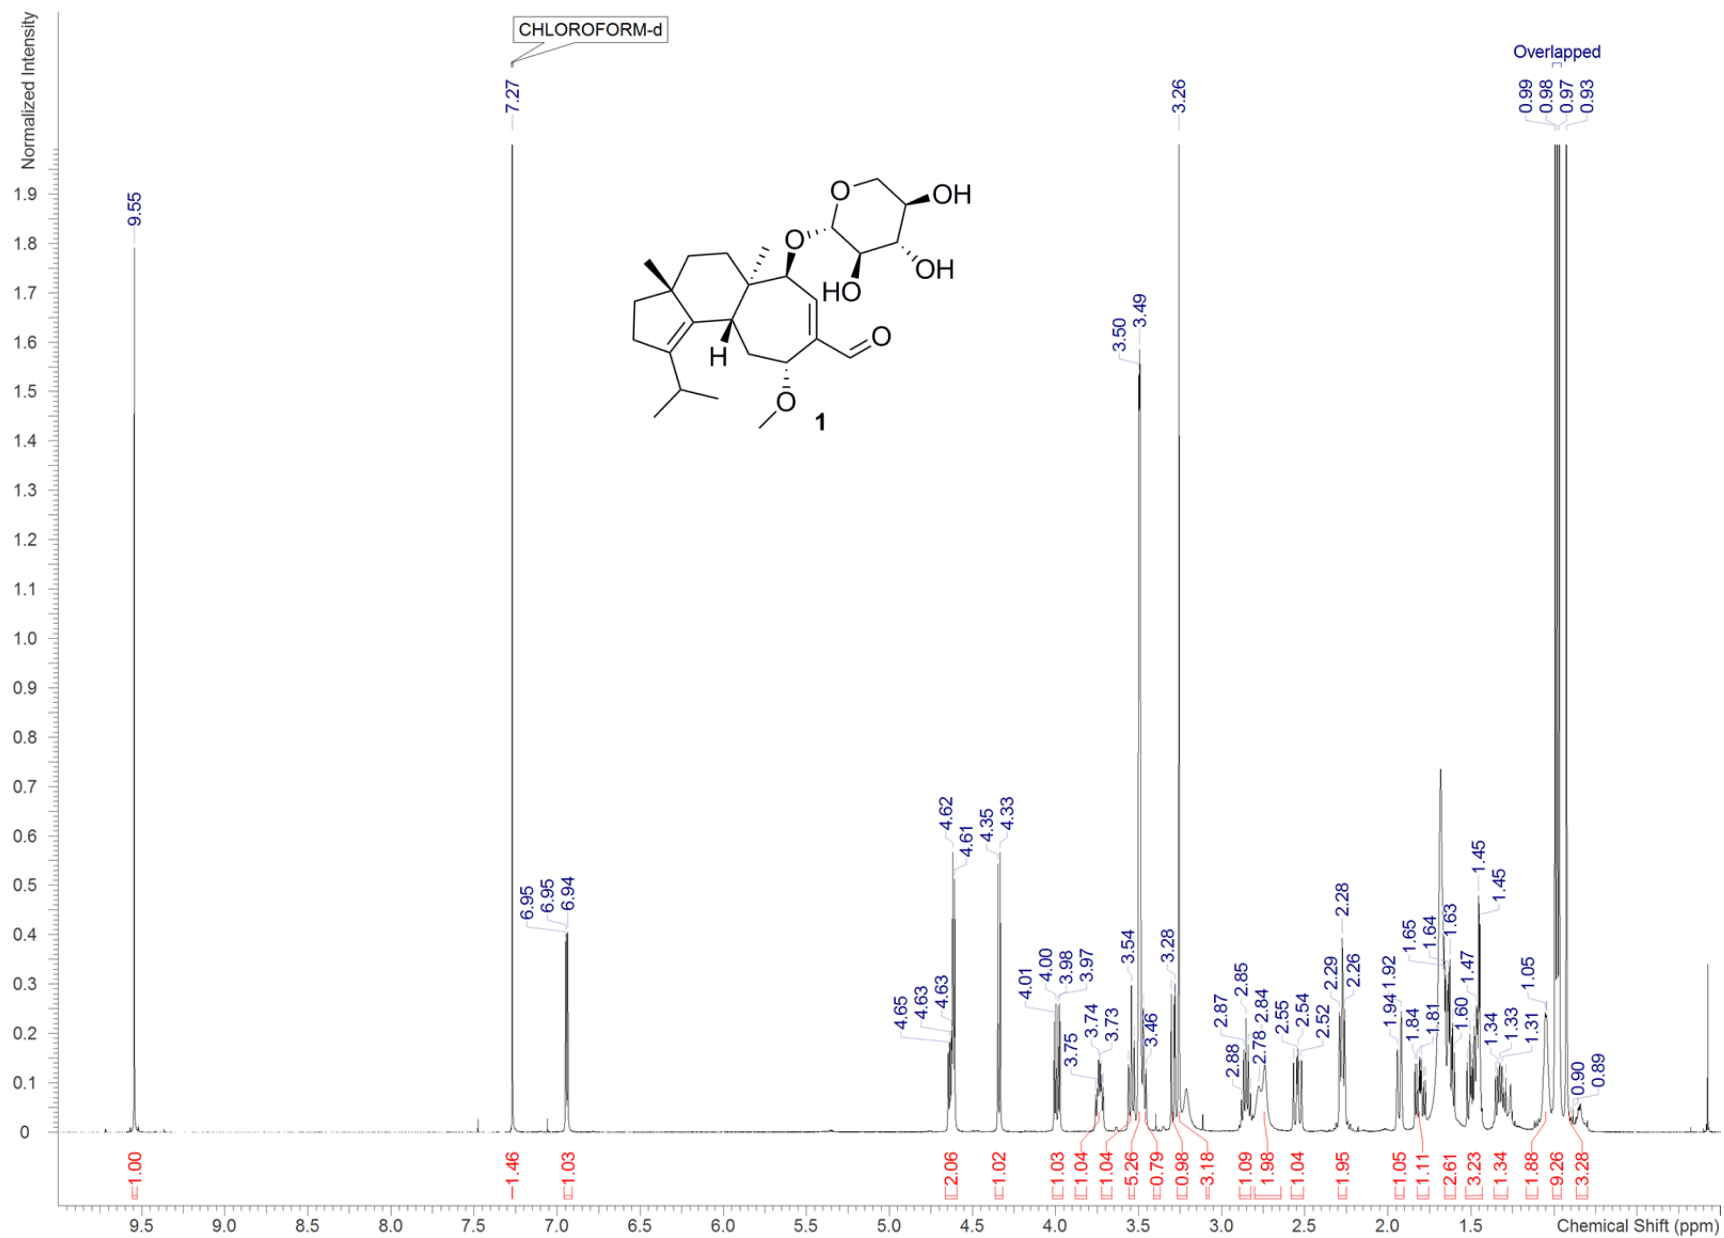

Figure S2:  $^{13}\text{C}$ -NMR spectrum (500 MHz,  $\text{CDCl}_3$ ) of Erinacine Z1 (1)

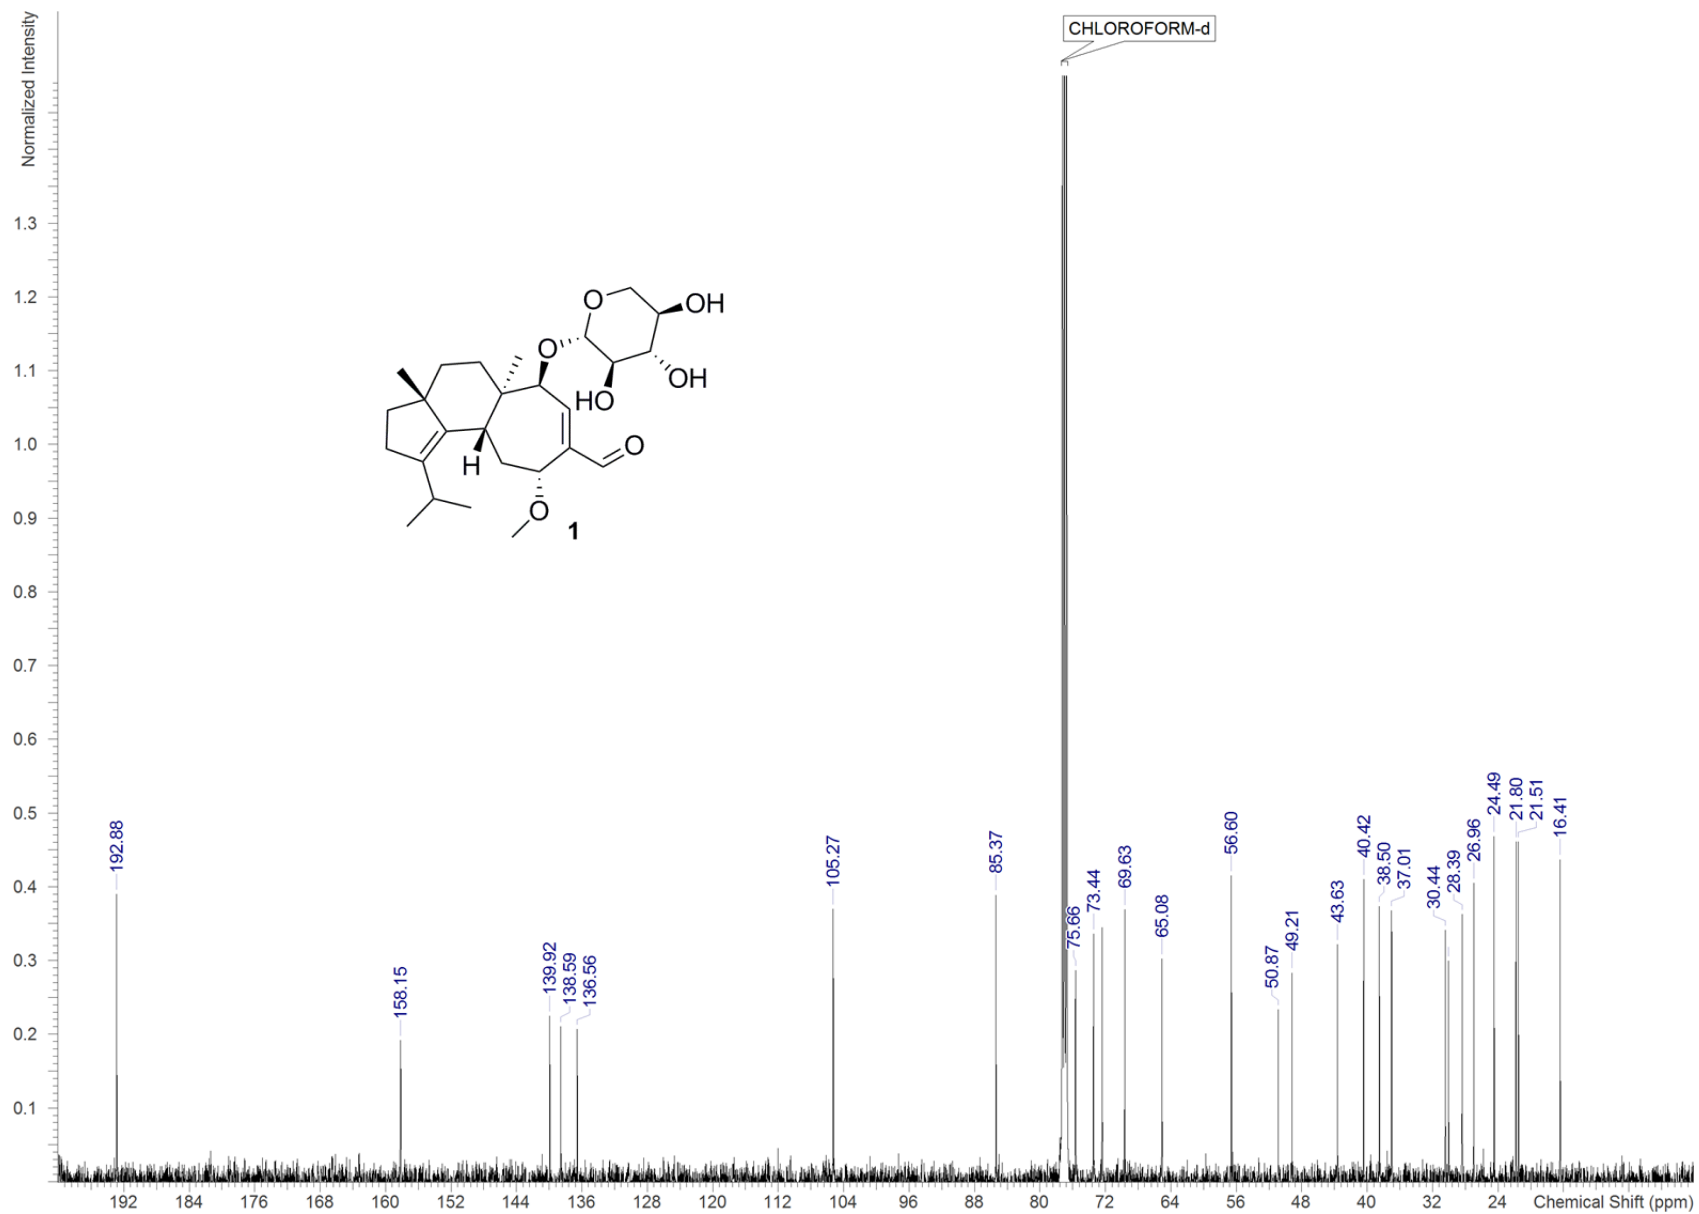

Figure S3: COSY spectrum (500 MHz, CDCl<sub>3</sub>) of Erinacine Z1 (1)

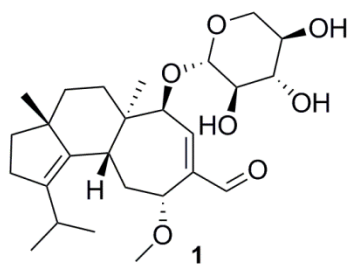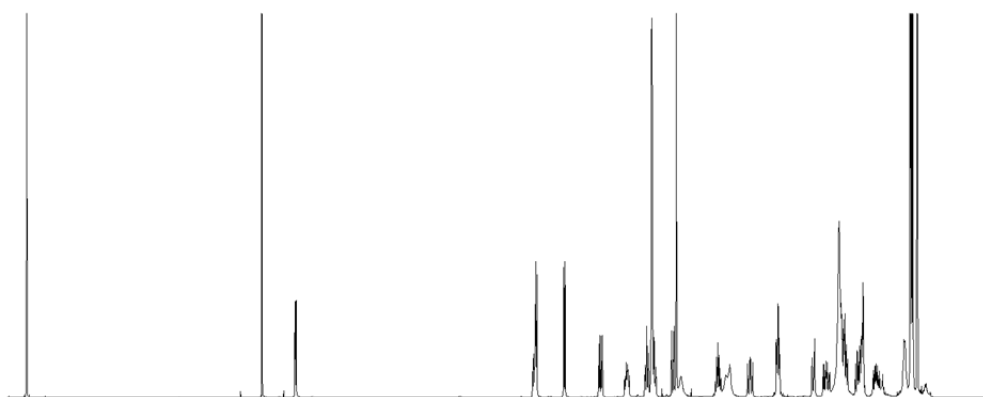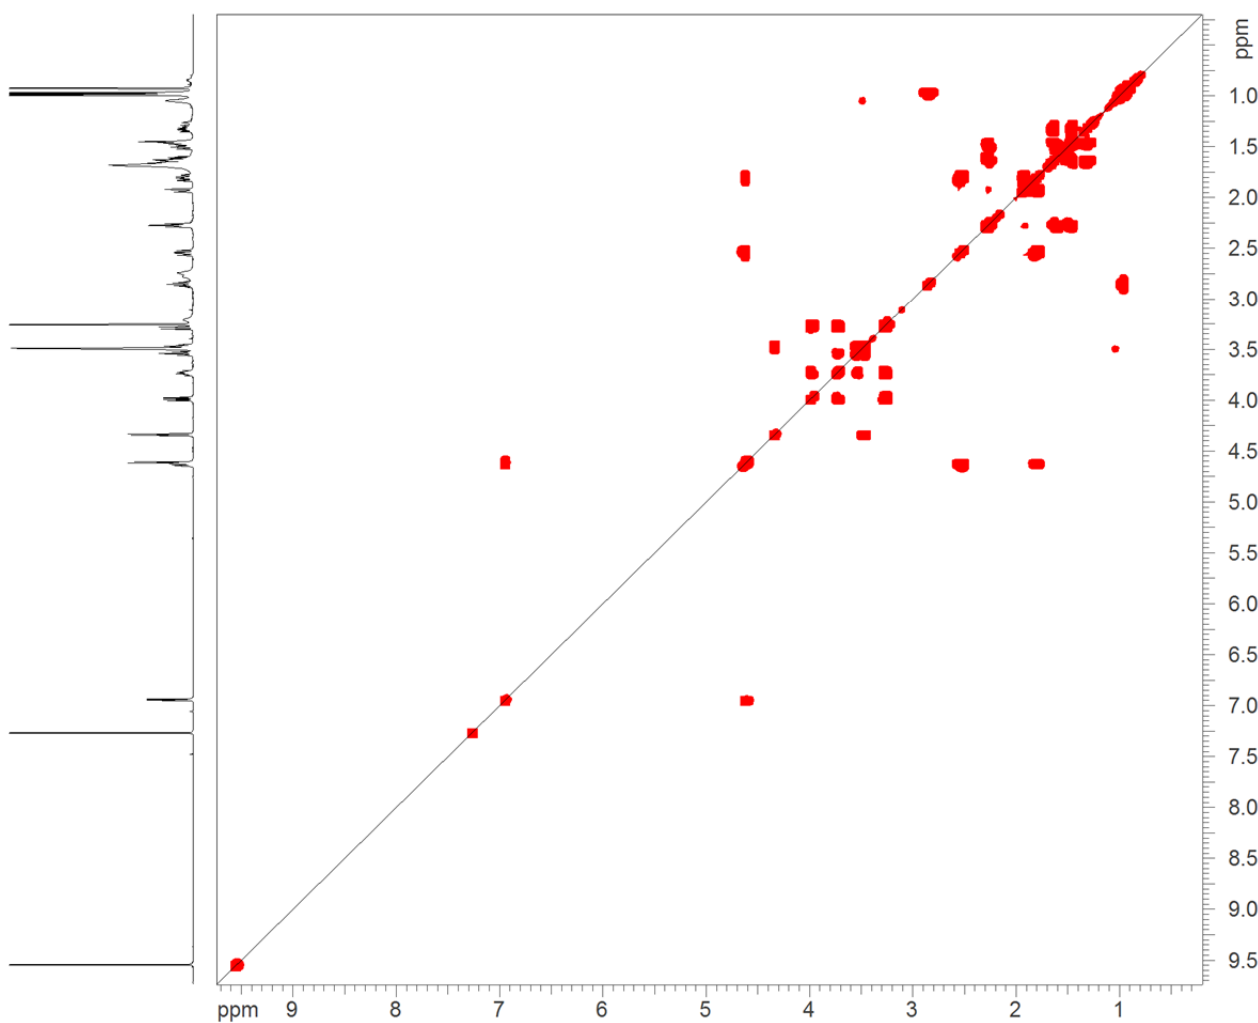

Figure S4: HSQC spectrum (500 MHz, CDCl<sub>3</sub>) of Erinacine Z1 (1)

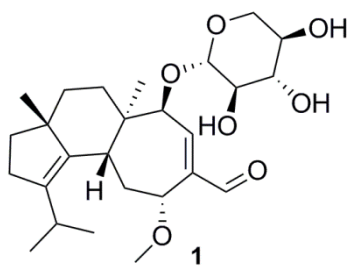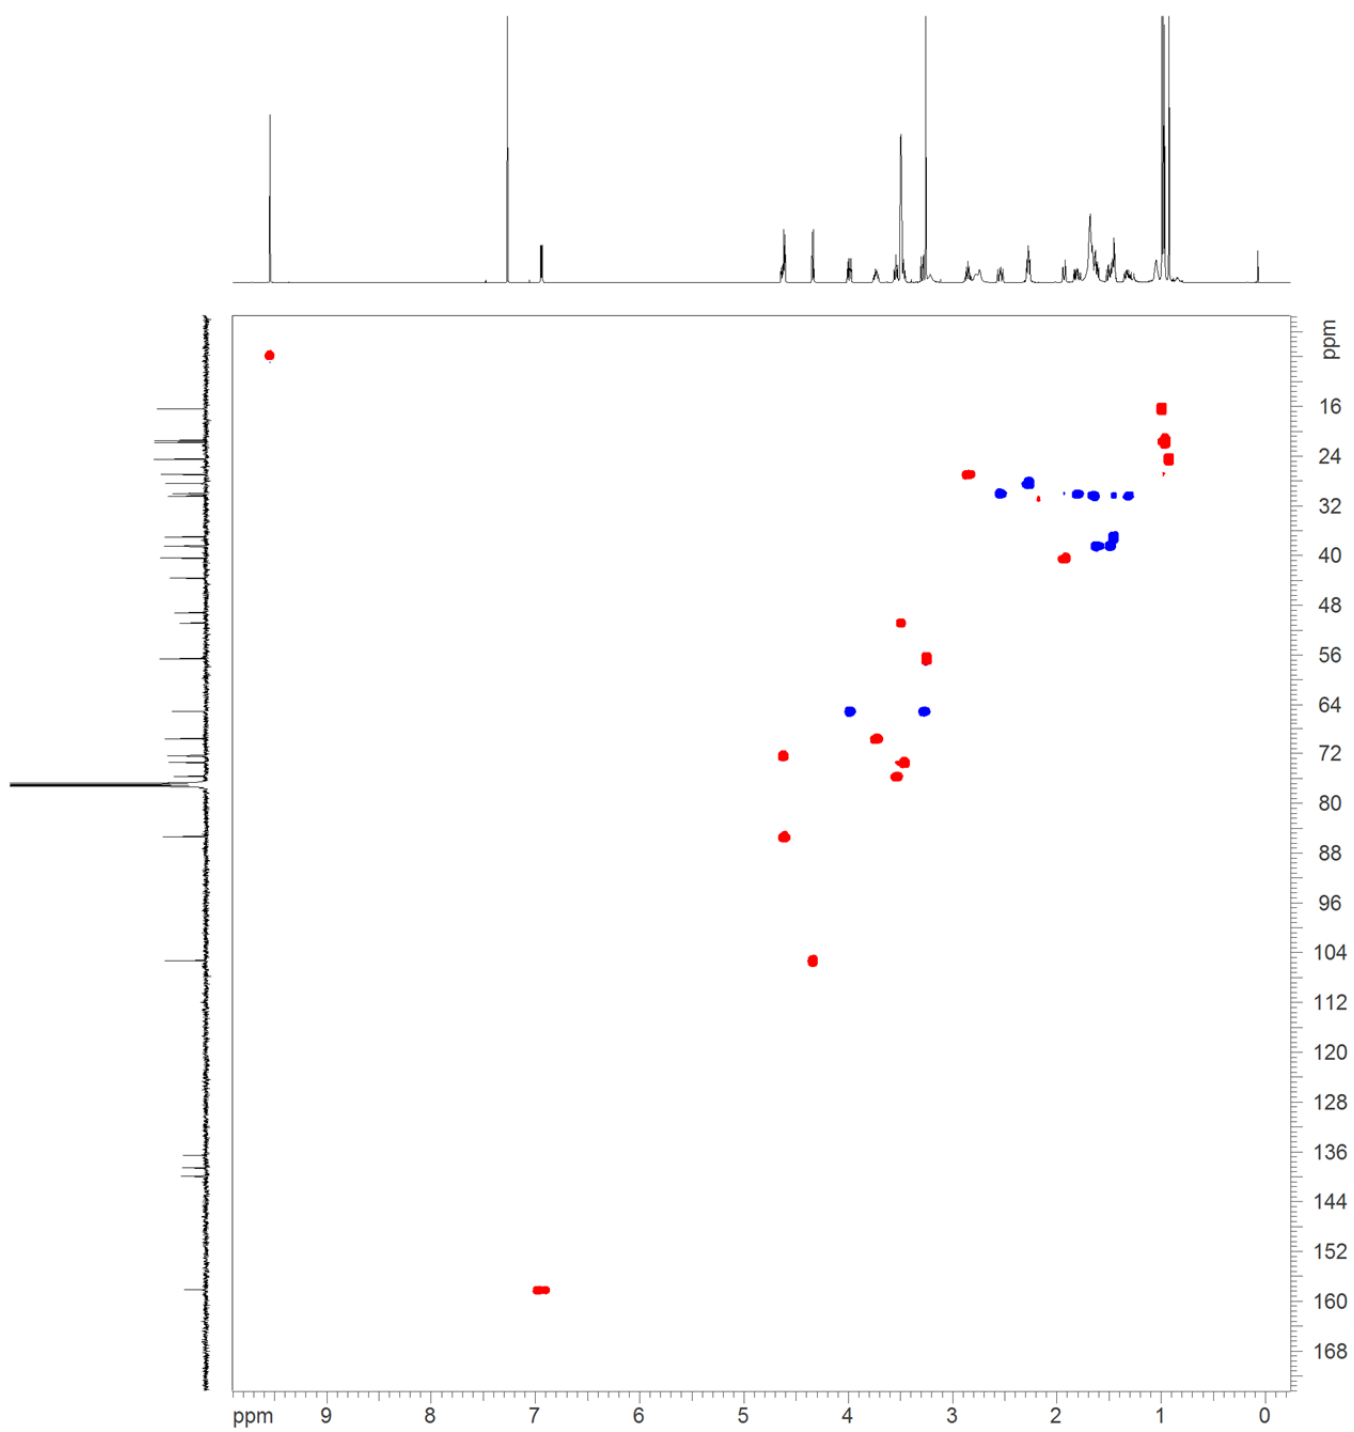

Figure S5: HMBC spectrum (500 MHz, CDCl<sub>3</sub>) of Erinacine Z1 (1)

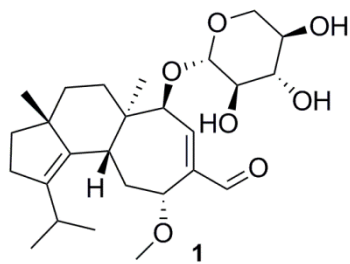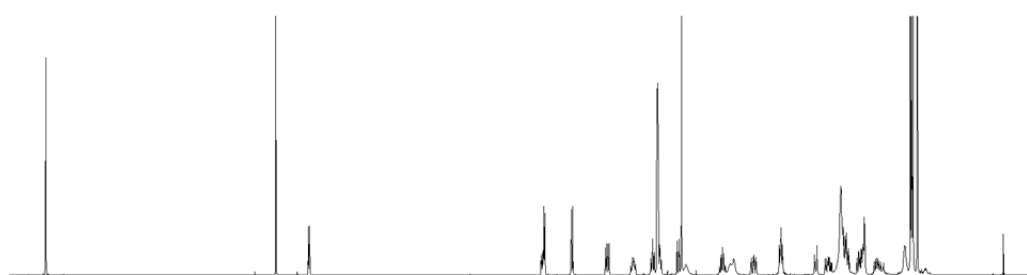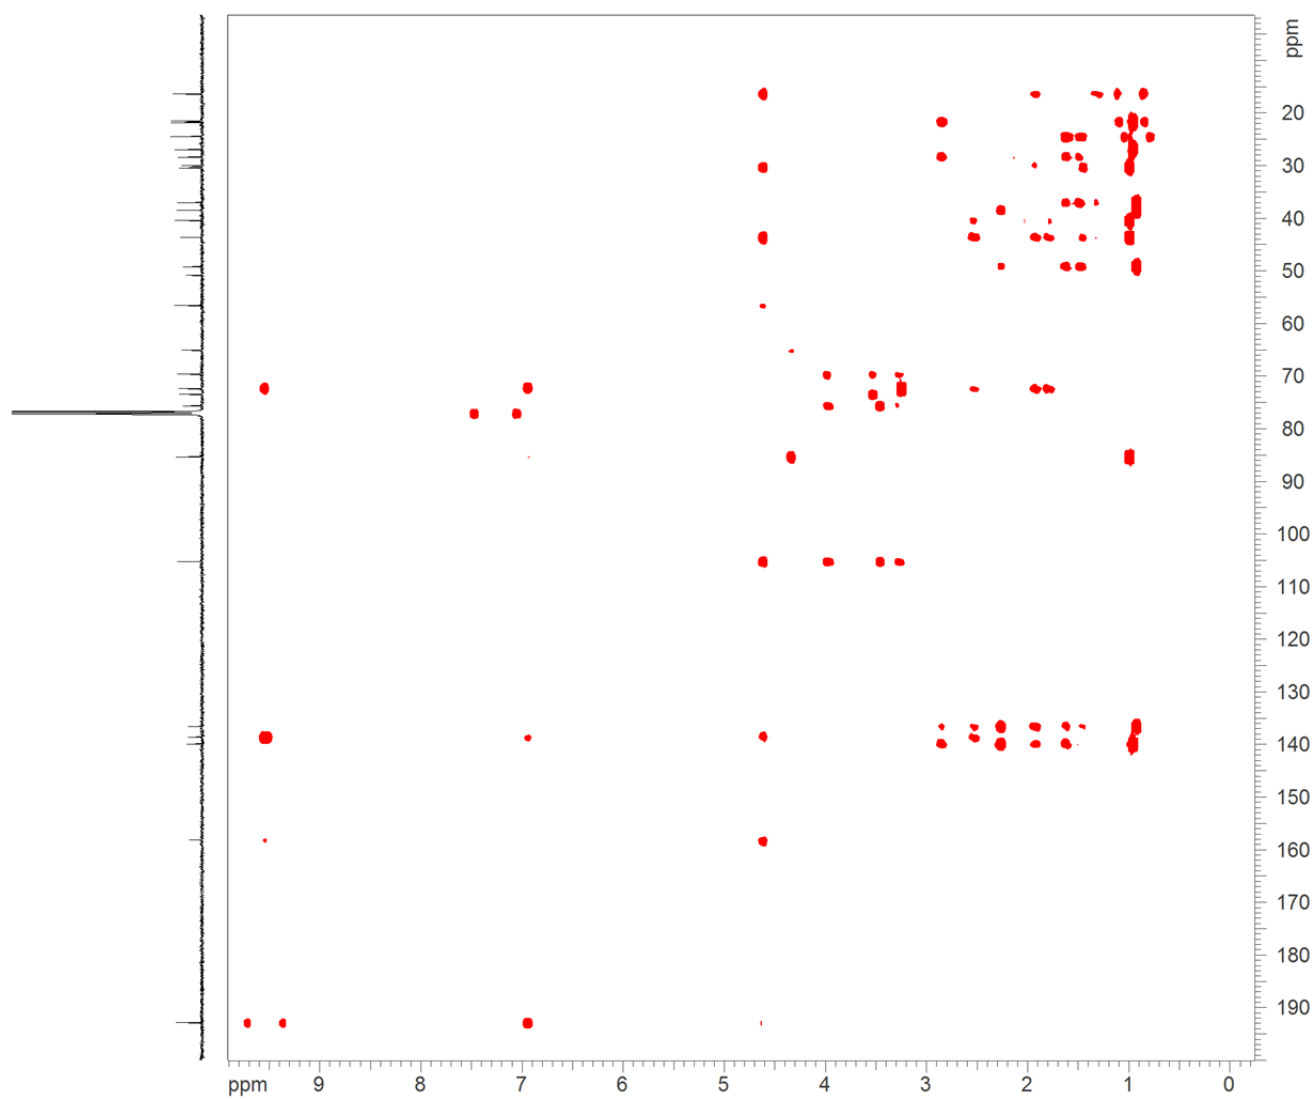

Figure S6: ROESY spectrum (500 MHz, CDCl<sub>3</sub>) of Erinacine Z1 (1)

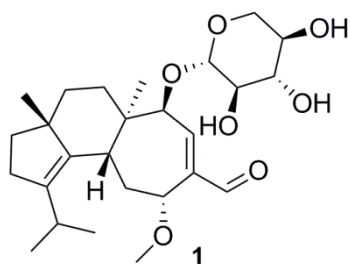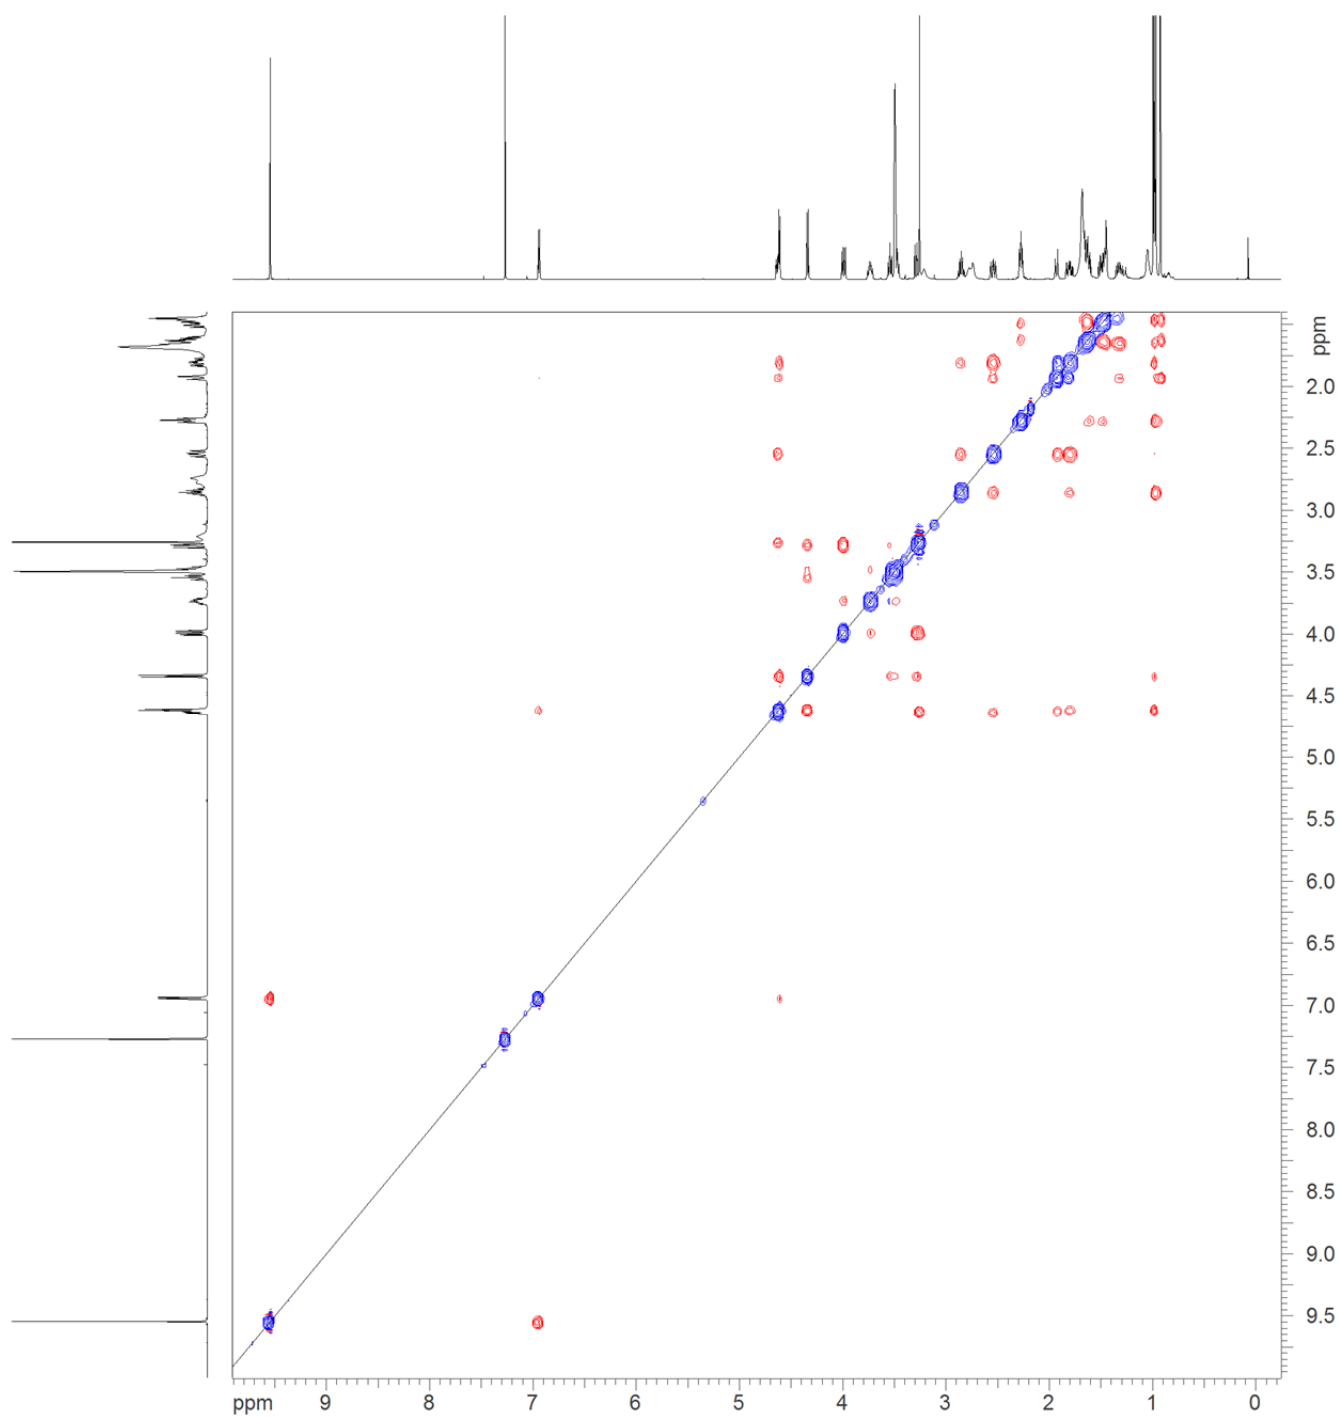

Figure S7: NOESY spectrum (500 MHz, CDCl<sub>3</sub>) of Erinacine Z1 (1)

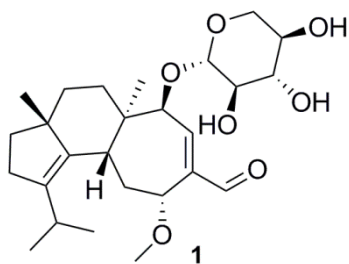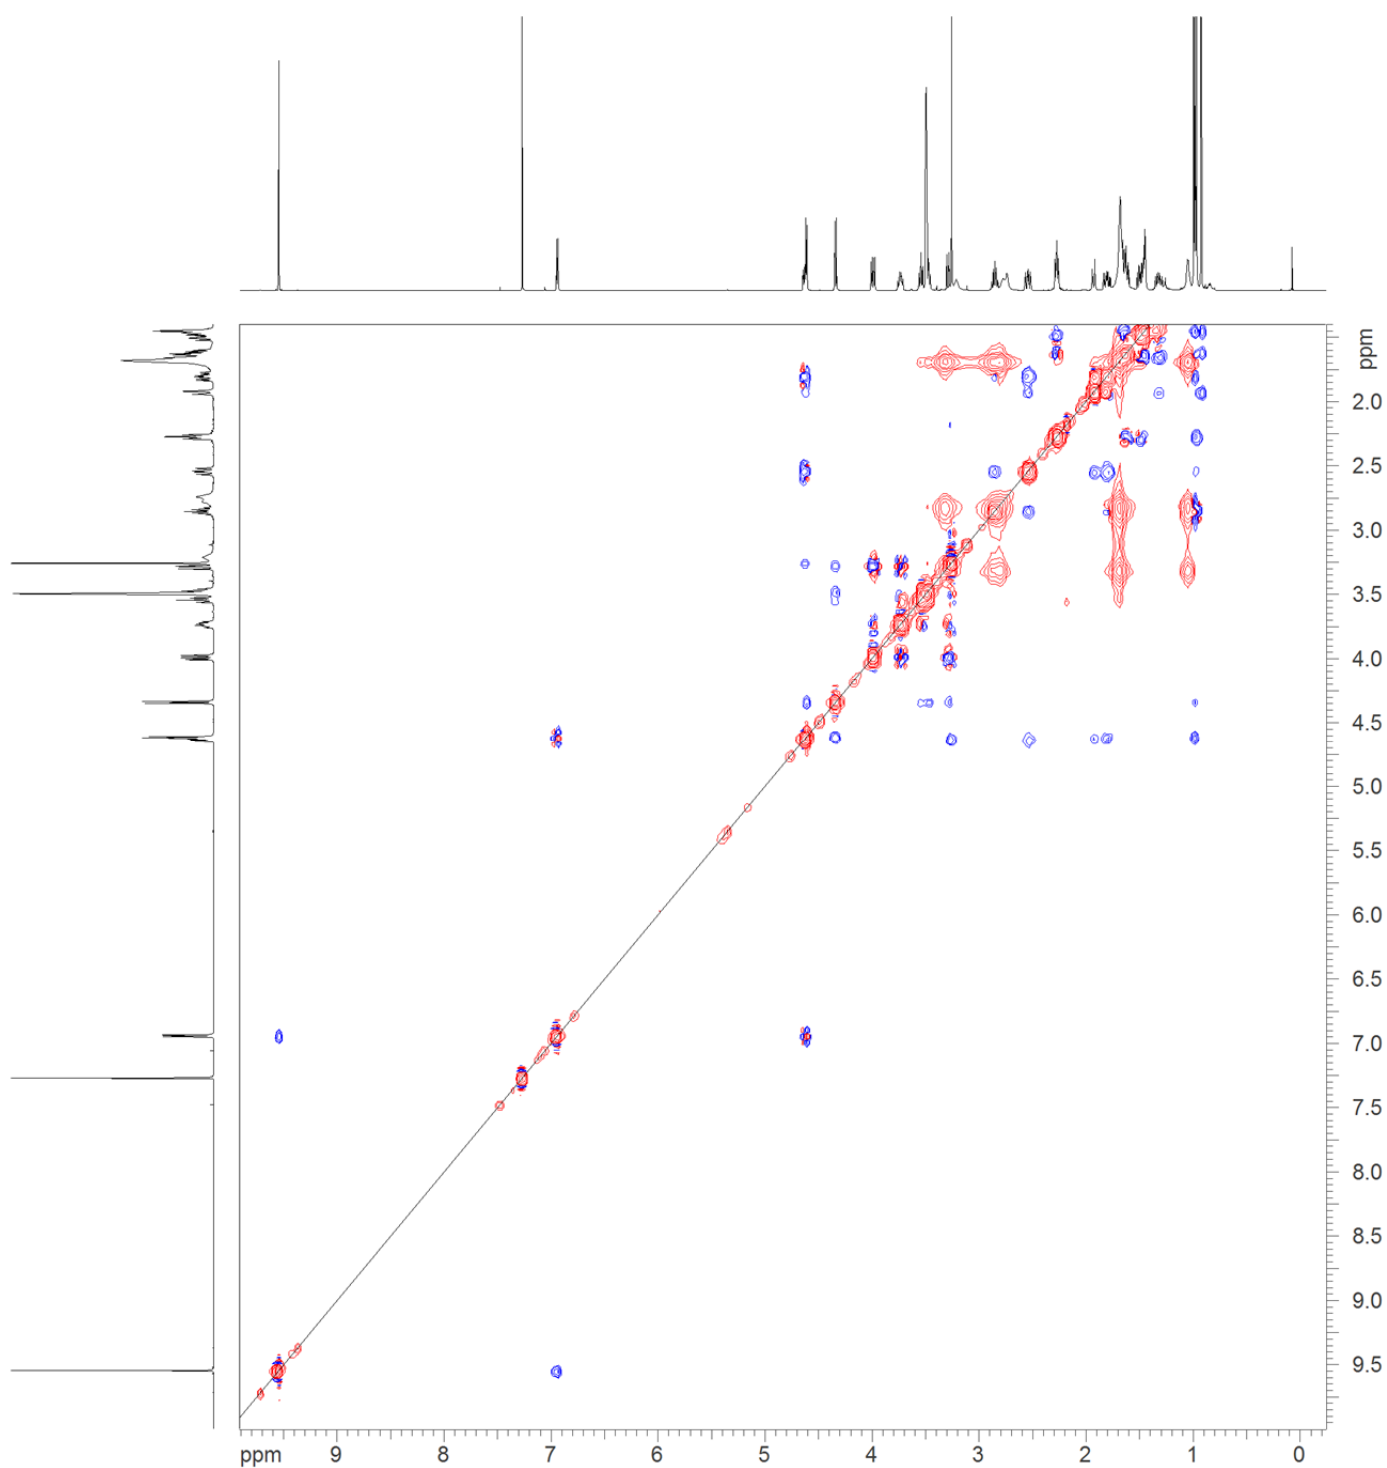



Figure S8: <sup>1</sup>H-NMR spectrum (700 MHz, acetone-d<sub>6</sub>) of Erinacine Z2 (2)

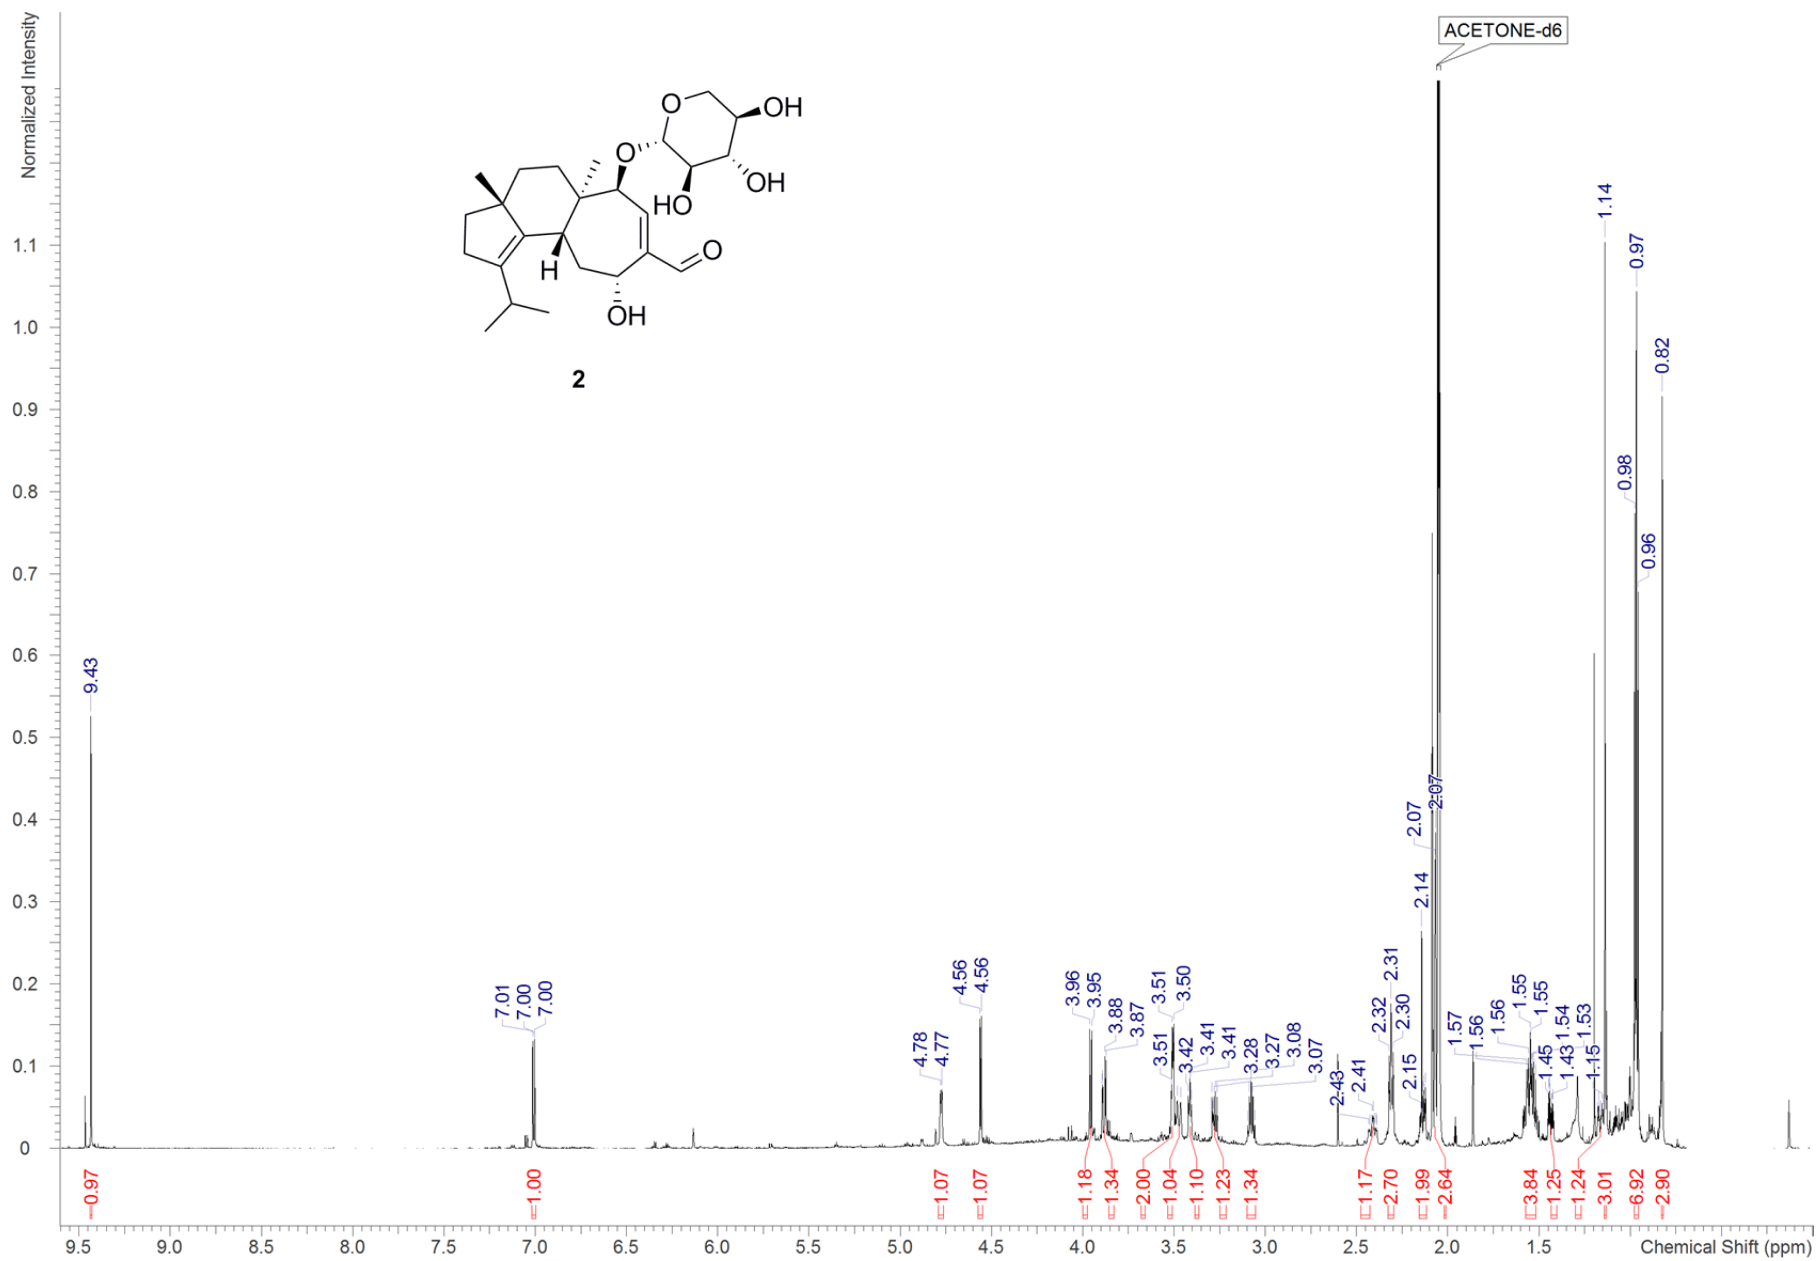

Figure S9:  $^{13}\text{C}$ -NMR spectrum (700 MHz, acetone- $d_6$ ) of Erinacine Z2 (2)

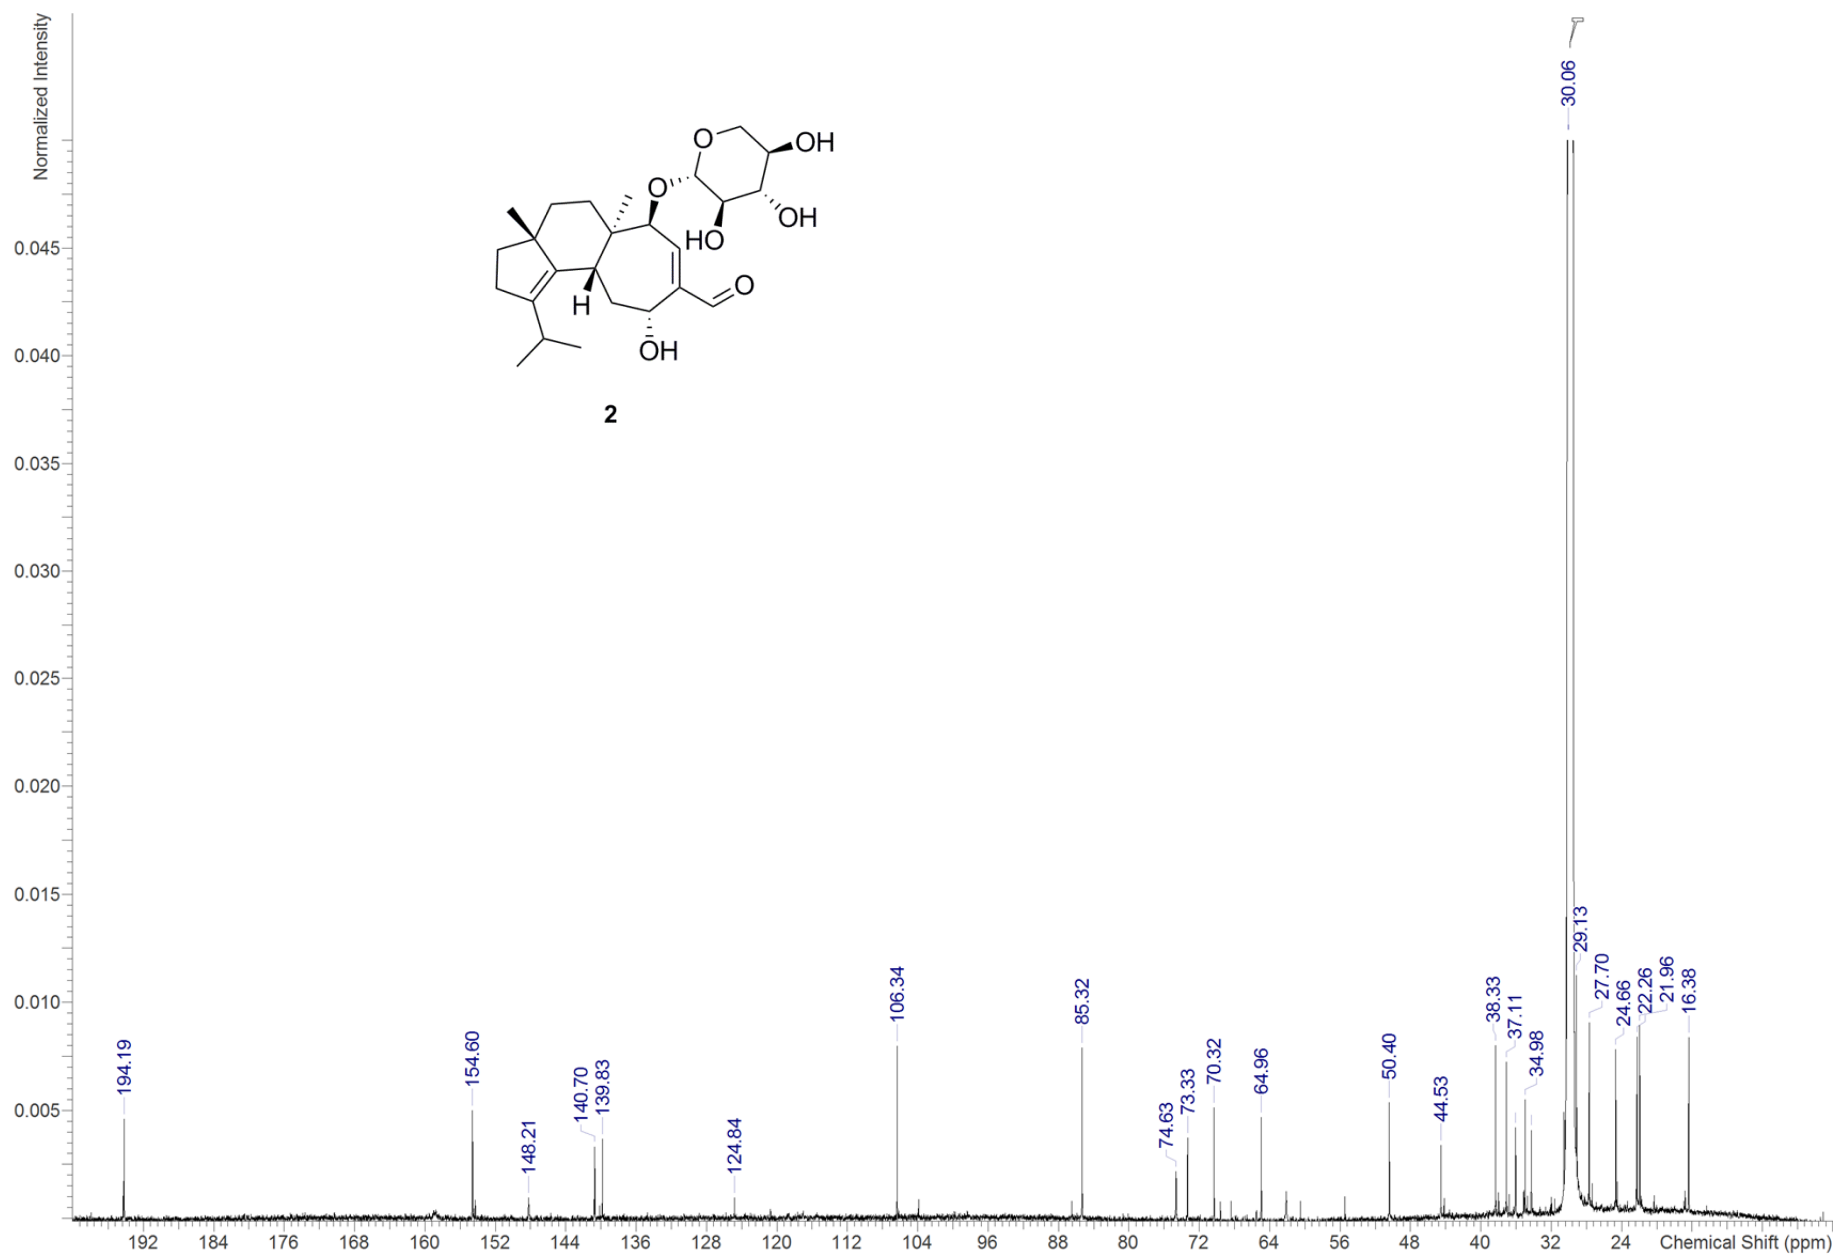

Figure S10: COSY-NMR spectrum (700 MHz, acetone-d6) of Erinacine Z2 (2)

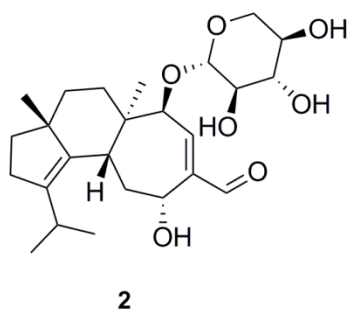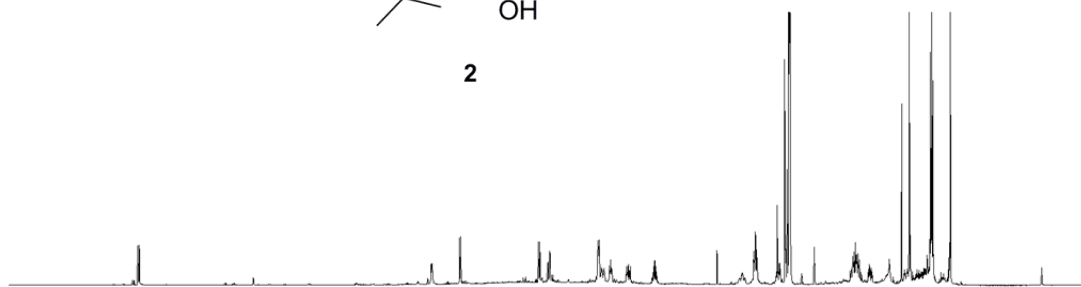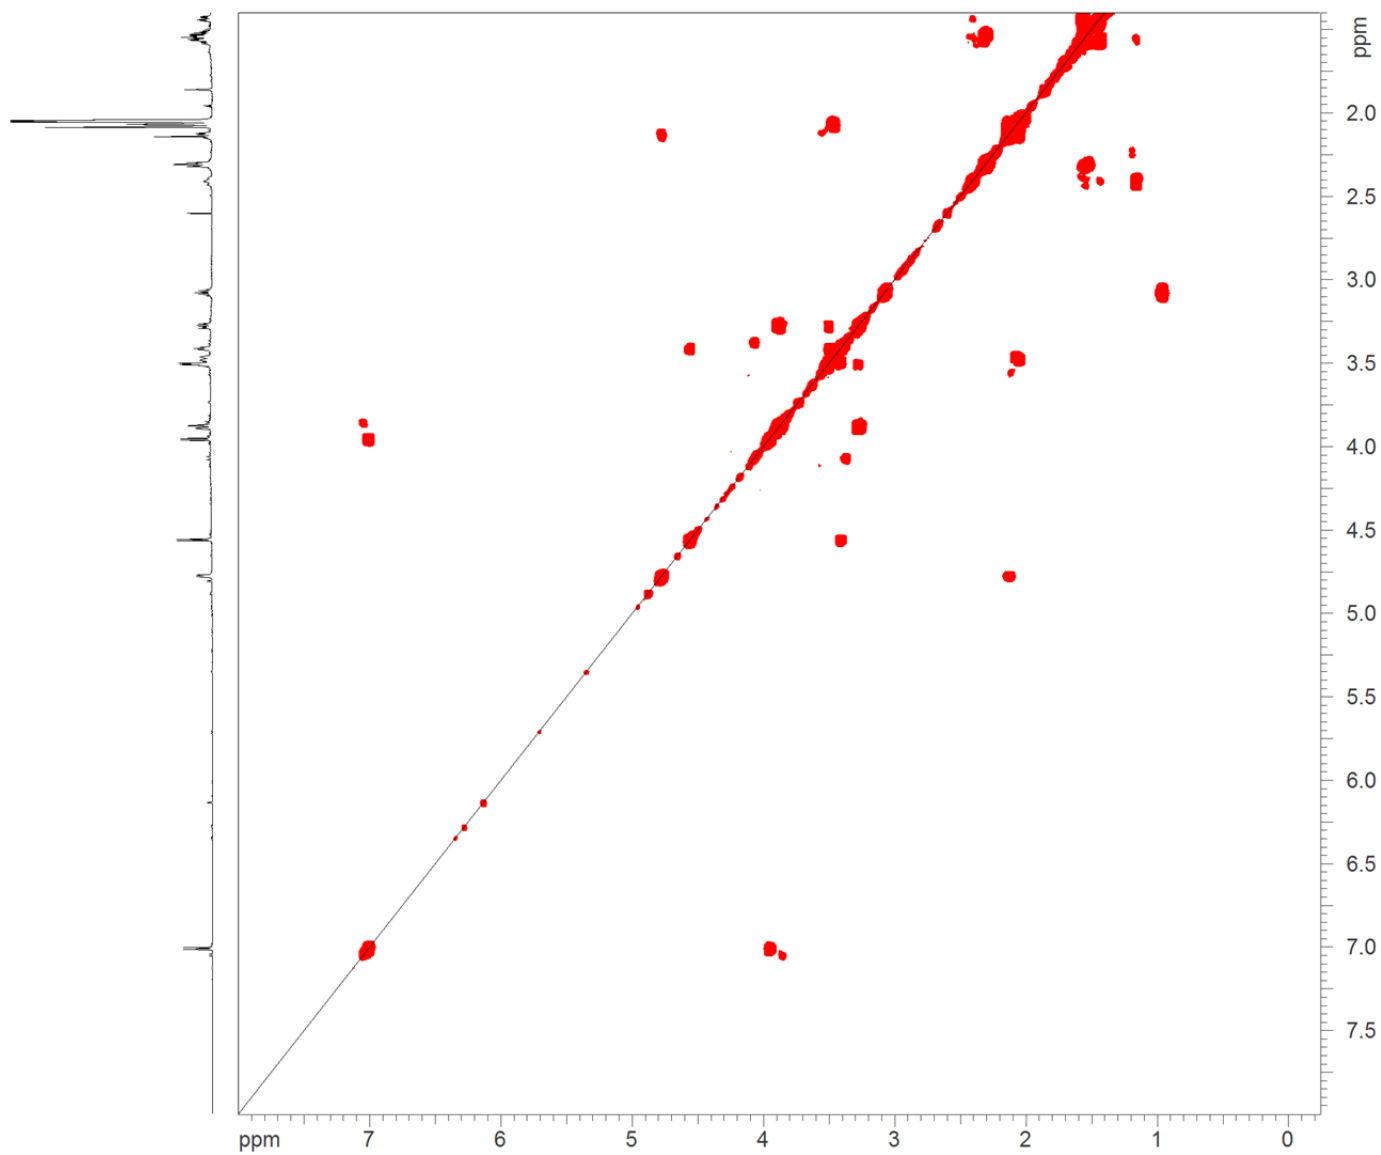

Figure S11: HSQC-NMR spectrum (700 MHz, acetone-d<sub>6</sub>) of Erinacine Z2 (2)

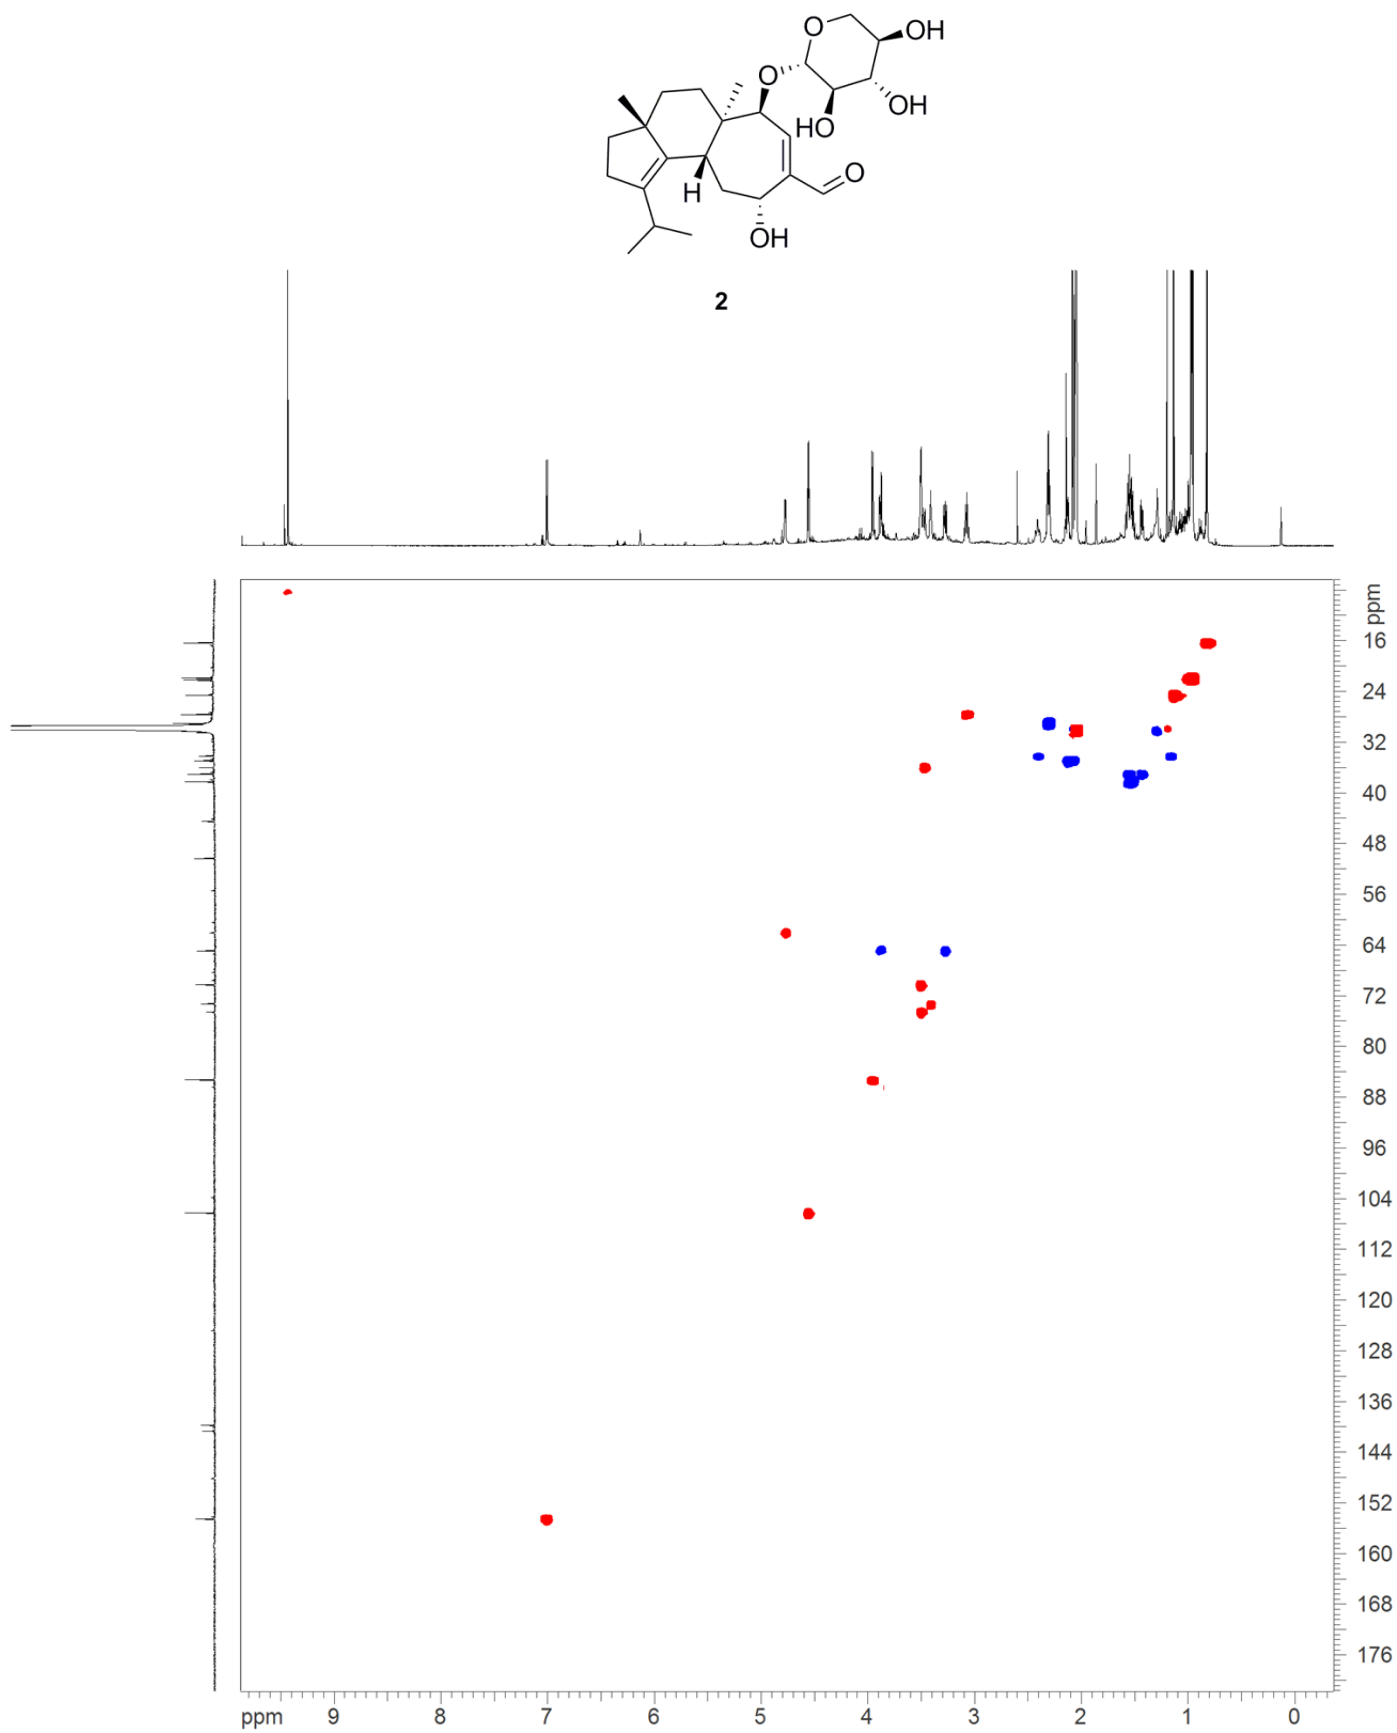

Figure S12: HMBC-NMR spectrum (700 MHz, acetone-d6) of Erinacine Z2 (2)

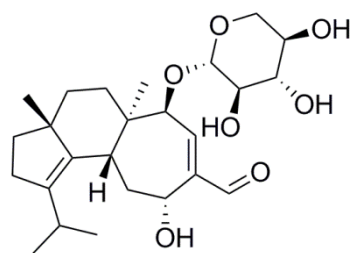

2

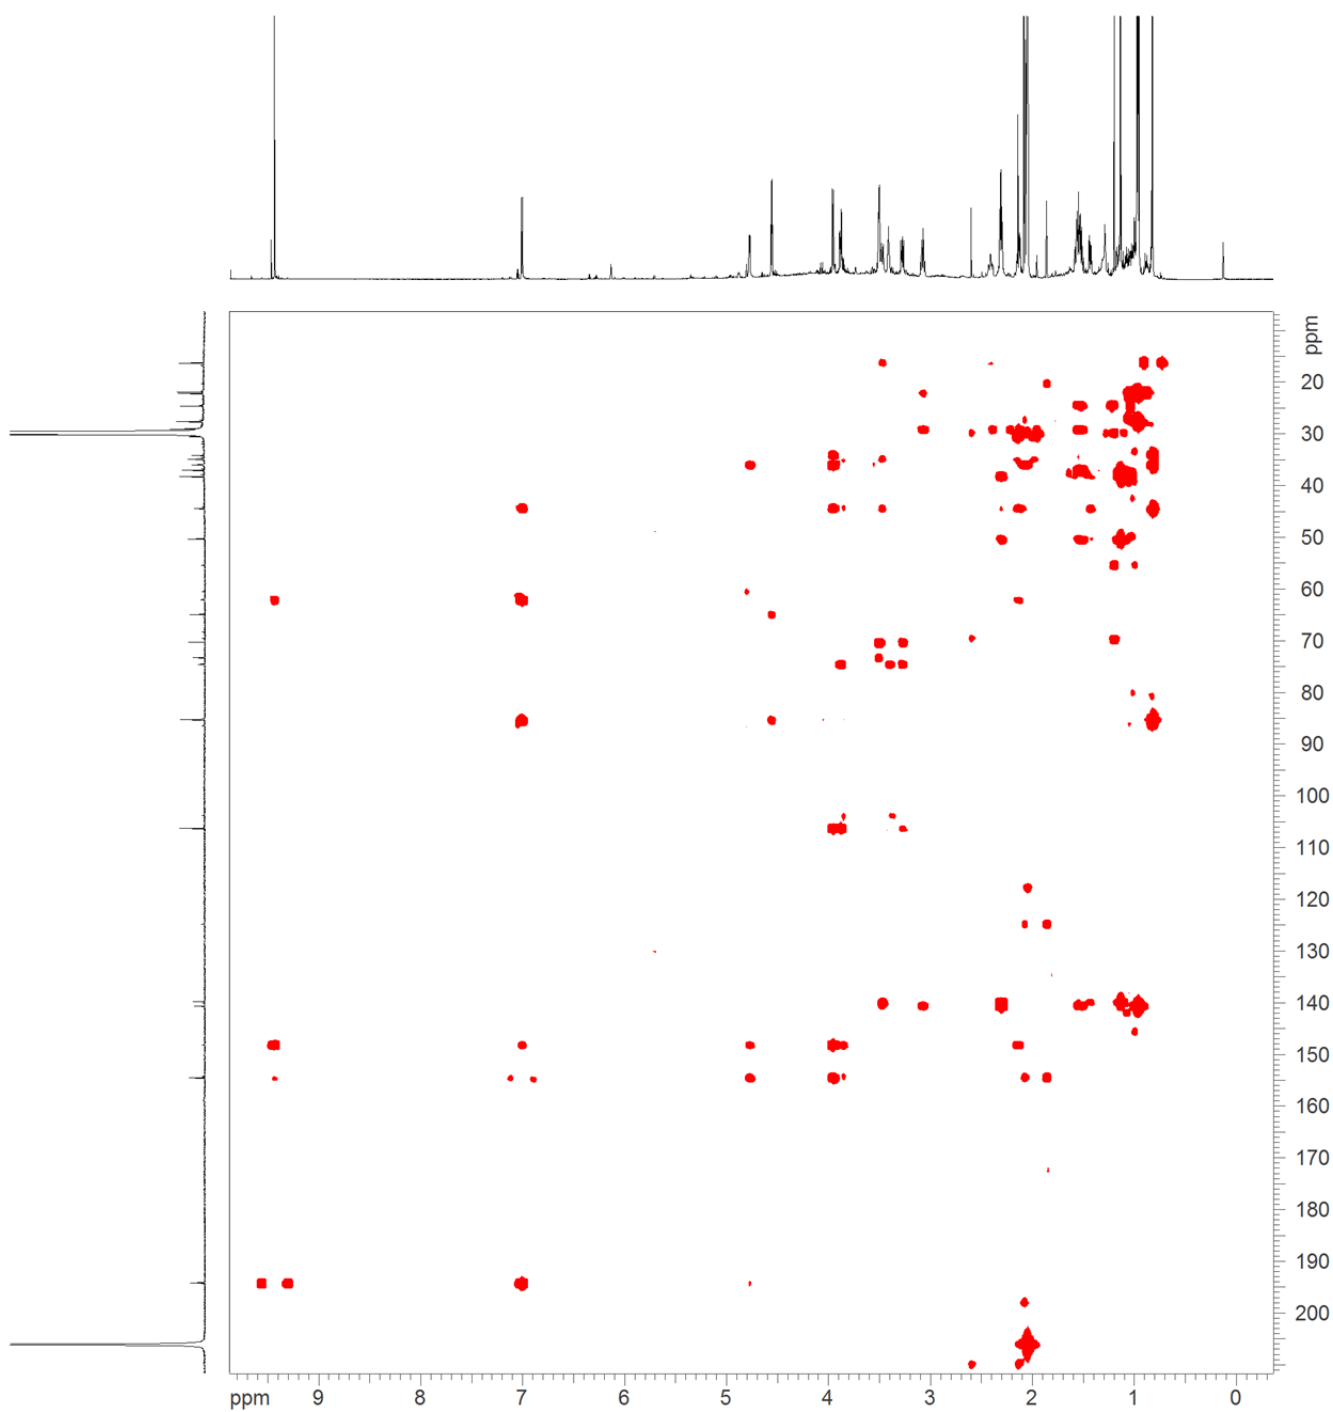

Figure S13: ROESY-NMR spectrum (700 MHz, acetone-d<sub>6</sub>) of Erinacine Z2 (2)

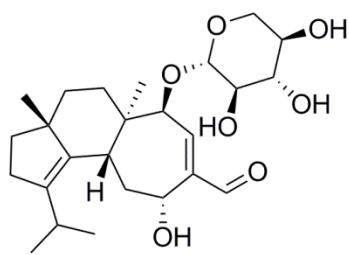

2

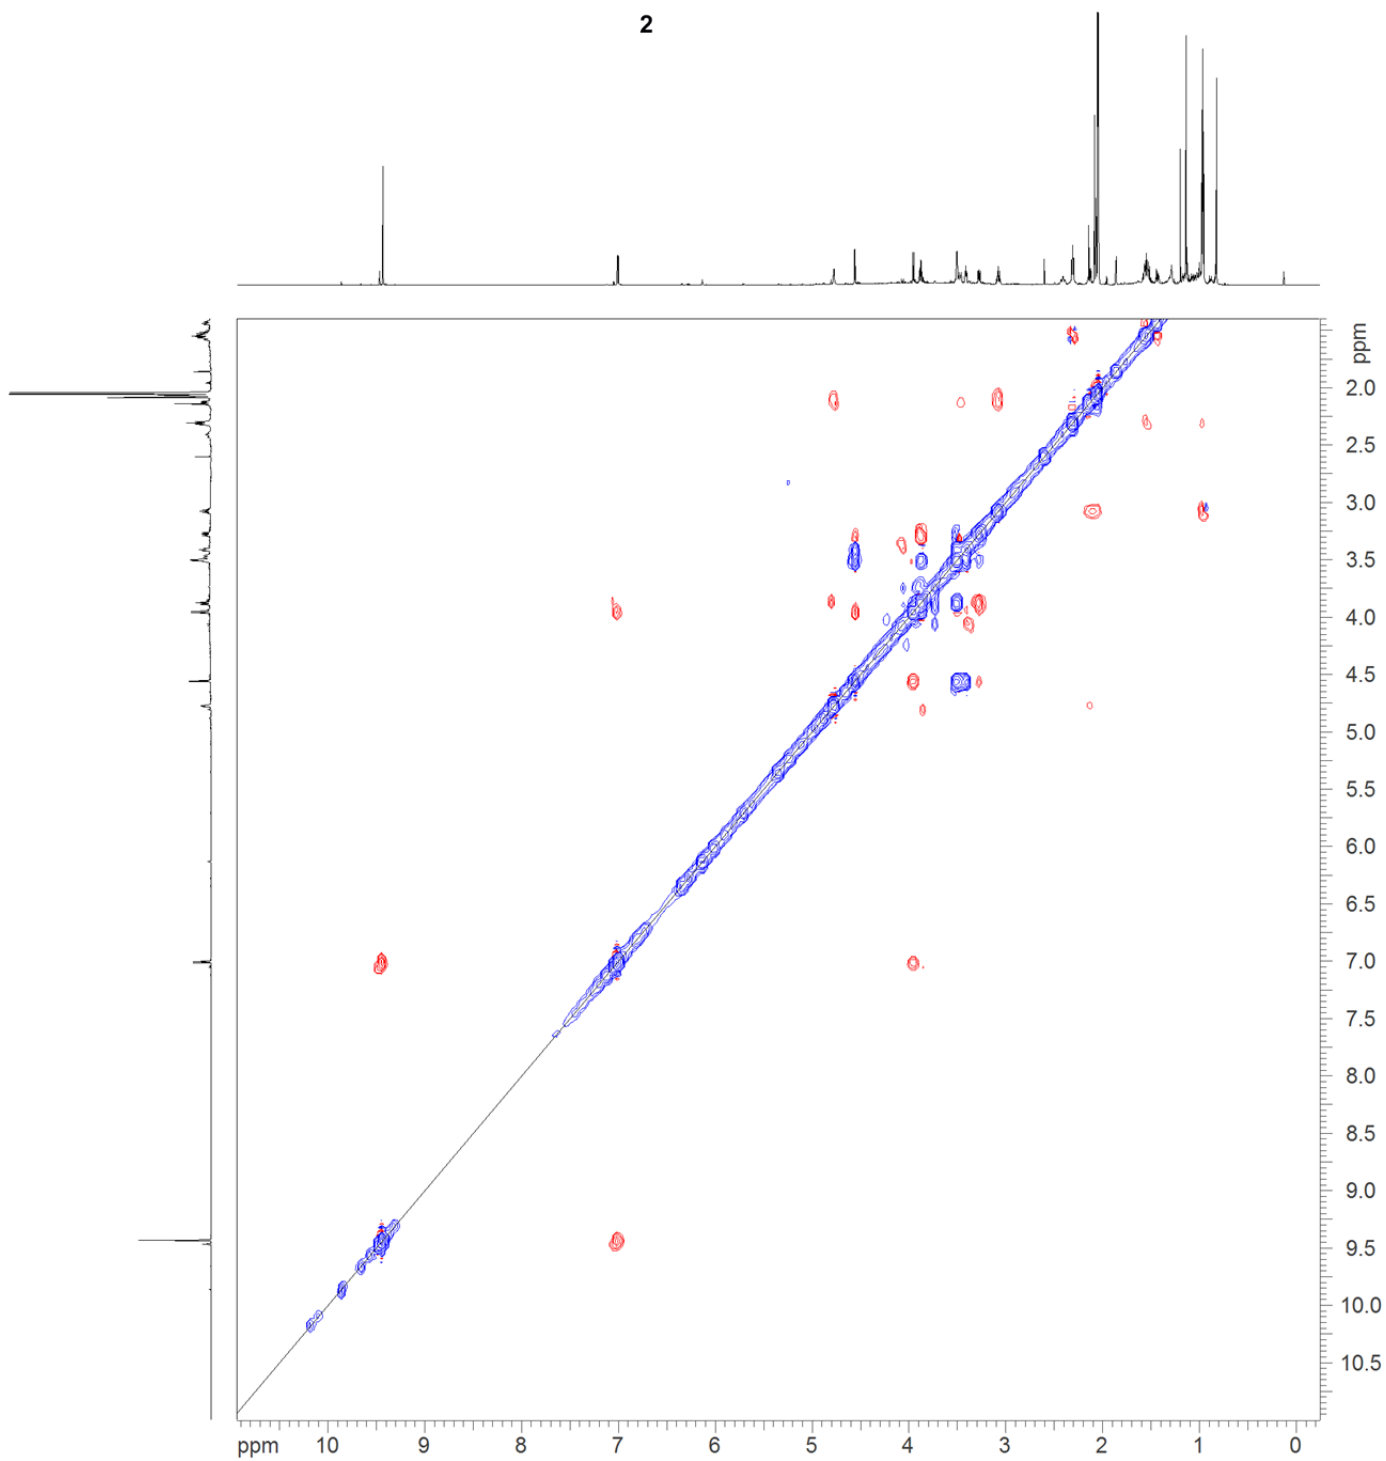

Supplement: ijms-19-00740-s001.pdf [file ijms-19-00740-s001.pdf]
